# Supplementary material for: The intramolecular H-bonding effect on the growth and stability of Schiff-base surface covalent organic frameworks
Source: Royal Society of Chemistry journal article supplement (doi:10.1039/c6cp06894d), 2016-11-23
Supplement: c6cp06894d1.pdf [file c6cp06894d1.pdf]

## *Supporting Information*

# The Intramolecular H-bonding Effects on the Growth and Stability of Schiff-base Surface Covalent Organic Frameworks

Yi-Ping Mo,<sup>a,b</sup> Xuan-He Liu,<sup>a,b</sup> Bing Sun,<sup>a,b</sup> Hui-Juan Yan,<sup>ab</sup> Dong Wang,<sup>\*a</sup> and Li-Jun Wan<sup>\*a</sup>

<sup>a</sup> Key Laboratory of Molecular Nanostructure and Nanotechnology and Beijing National Laboratory for Molecular Sciences, Institute of Chemistry, Chinese Academy of Sciences (CAS), Beijing 100190, P.R. China

<sup>b</sup> University of Chinese Academy of Sciences, Beijing 100049, P.R.China.

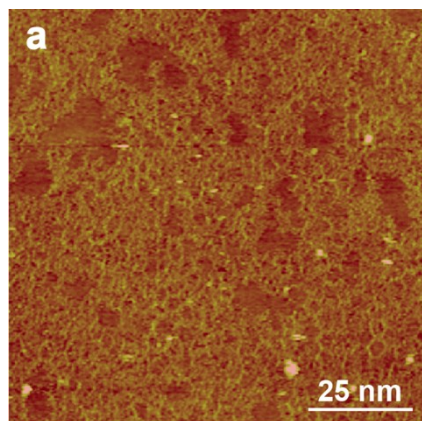

**Fig. S1** Large scale STM images of SCOF-1 on HOPG obtained by heating 120 °C for 3h without Ar protection . Imaging conditions:  $V_{\text{bias}} = 700 \text{ mV}$ ,  $I_t = 500 \text{ pA}$ .

**Table S1** Structural models of conceivable networks obtained by reaction between TAPB and 2,3-DHTPA due to the asymmetrically substitution of hydroxyl functional group and the corresponding adsorption energy by Forcite using Dreiding force field.

|                                           |                 |                 |                 |                 |
|-------------------------------------------|-----------------|-----------------|-----------------|-----------------|
| Simplified schematic diagram              |                 |                 |                 |                 |
| Structural models of conceivable networks |                 |                 |                 |                 |
| Adsorption energy                         | 312.53 kcal/mol | 316.93 kcal/mol | 317.54 kcal/mol | 318.99 kcal/mol |

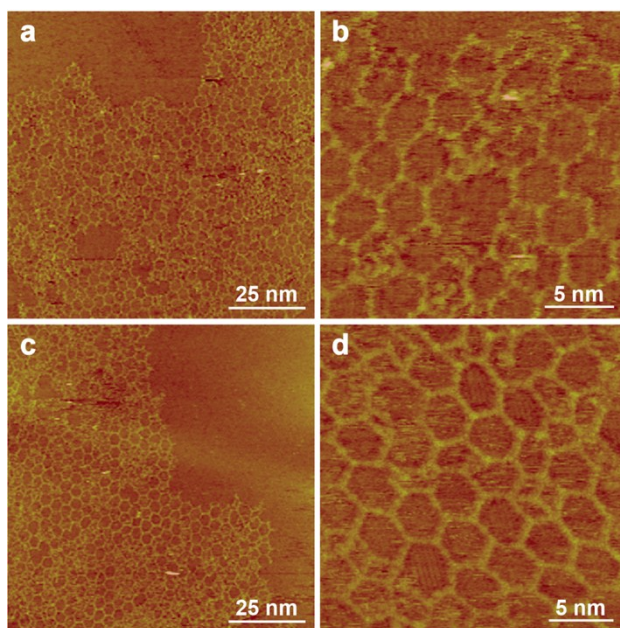

**Fig. S2** Large scale and high resolution STM images of SCOFs synthesized by TAPB and terephthalaldehyde in 110 °C. (a, b) without Ar protection. (c, d) in Ar atmosphere. Imaging conditions:  $V_{\text{bias}} = 693 \text{ mV}$ ,  $I_t = 495 \text{ pA}$ .

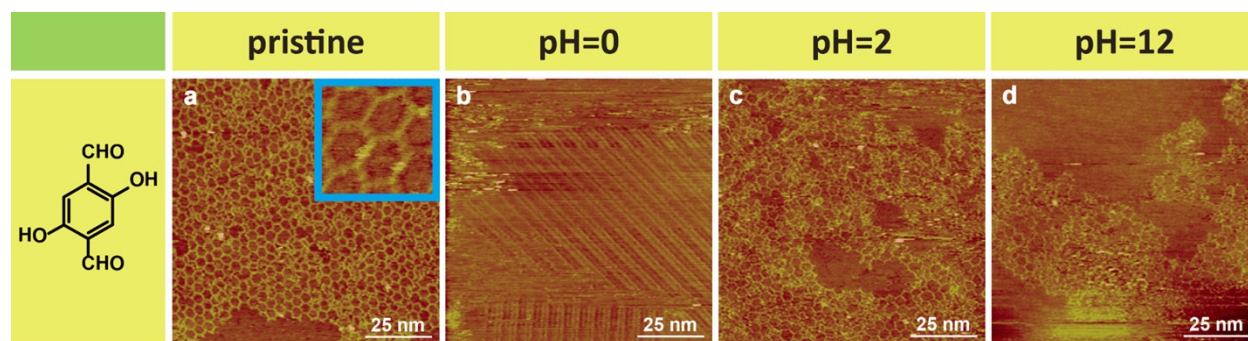

**Fig. S3** The stability study of SCOF-2. (a) The pristine STM image of generated network; (b) The STM image of network after 1 mol/L HCl treatment; (c) The STM images of network after 0.01 mol/L HCl treatment; (d) The STM image of network after 0.01 mol/L KOH treatment. Imaging conditions: (a)  $V_{\text{bias}} = 630 \text{ mV}$ ,  $I_t = 550 \text{ pA}$ ; (b)  $V_{\text{bias}} = 700 \text{ mV}$ ,  $I_t = 500 \text{ pA}$ ; (c)  $V_{\text{bias}} = 414 \text{ mV}$ ,  $I_t = 546 \text{ pA}$ ; (d)  $V_{\text{bias}} = 456 \text{ mV}$ ,  $I_t = 546 \text{ pA}$ .
